# Supplementary material
Source: HighWire-hosted journal article supplement (http://www.jneurosci.org/highwire/filestream/599407/field_highwire_adjunct_files/0/Supplementary_tables.pdf)
Supplement: Supplementary_tables.pdf [file Supplementary_tables.pdf]

Supplementary Table 1. Tissue content of monoamines and their metabolites in different brain regions.

|                 |             | <i>Ung</i> <sup>+/+</sup> ND | <i>Ung</i> <sup>-/-</sup> ND | <i>Ung</i> <sup>+/+</sup> FD | <i>Ung</i> <sup>-/-</sup> FD |
|-----------------|-------------|------------------------------|------------------------------|------------------------------|------------------------------|
| m/s-cortex      | 5-HT        | 926.0 ± 43.2                 | 799.7 ± 59.6                 | 895.5 ± 40.8                 | 858.1 ± 56.0                 |
|                 | 5-HIAA      | 950.0 ± 90.0                 | 728.3 ± 60.3                 | 783.2 ± 36.3                 | 625.9 ± 48.5                 |
|                 | 5-HIAA/5-HT | 0.942 ± 0.080                | 0.871 ± 0.090                | 0.821 ± 0.060                | 0.706 ± 0.090                |
| amygdala        | 5-HIAA/5-HT | 0.640 ± 0.038                | 0.700 ± 0.036                | 0.547 ± 0.053*               | 0.533 ± 0.028*               |
| frontal cortex  | 5-HT        | 796.5 ± 42.8                 | 702.7 ± 31.3                 | 832.7 ± 63.8                 | 738.6 ± 55.7                 |
|                 | 5-HIAA      | 670.3 ± 56.7                 | 567.5 ± 51.4                 | 559.7 ± 43.0                 | 512.9 ± 41.5                 |
|                 | 5-HIAA/5-HT | 0.791 ± 0.080                | 0.734 ± 0.060                | 0.656 ± 0.090                | 0.678 ± 0.080                |
| hippo-campus    | 5-HIAA/5-HT | 1.390 ± 0.129                | 1.287 ± 0.083                | 1.186 ± 0.131                | 1.109 ± 0.091                |
| parietal cortex | 5-HT        | 250.2 ± 15.5                 | 264.5 ± 24.4                 | 232.7 ± 17.9*                | 226.7 ± 15.7*                |
|                 | 5-HIAA      | 453.7 ± 30.9                 | 420.8 ± 49.1                 | 340.7 ± 27.9                 | 327.2 ± 13.5                 |
|                 | 5-HIAA/5-HT | 1.697 ± 0.120                | 1.491 ± 0.130                | 1.282 ± 0.130                | 1.380 ± 0.096                |
| striatum        | 5-HIAA/5-HT | 1.477 ± 0.150                | 1.276 ± 0.084                | 1.156 ± 0.049*               | 1.134 ± 0.066*               |

N=8-10 animals per group. Values are expressed as picogram per mg wet weight (mean ± SEM). \*p<0.05 ND vs. FD; #p<0.05 *Ung*<sup>+/+</sup> vs. *Ung*<sup>-/-</sup>

Supplementary Table 2A. Baseline LDH-release and MTT metabolism in cell culture experiments (see Figure 1A, B)

|                                                                       | <i>Ung</i> <sup>+/+</sup><br>cortical<br>neurons | <i>Ung</i> <sup>-/-</sup><br>cortical<br>neurons | <i>Ung</i> <sup>+/+</sup><br>hippocampal<br>neurons | <i>Ung</i> <sup>-/-</sup><br>hippocampal<br>neurons |
|-----------------------------------------------------------------------|--------------------------------------------------|--------------------------------------------------|-----------------------------------------------------|-----------------------------------------------------|
| LDH [units/ml<br>medium] after 24<br>hrs                              | 56.2 ± 2.4                                       | 56.1 ± 2.4                                       | 59.9 ± 2                                            | 63.0 ± 2                                            |
| LDH [units/ml<br>medium] after 48<br>hrs                              | 72.3 ± 1.7                                       | 73.4 ± 2.3                                       | 62.1 ± 1.9                                          | 65.1 ± 2                                            |
| LDH [units/ml<br>medium] after 72<br>hrs                              | 78.9 ± 2.4                                       | 80.6 ± 2.8                                       | 63.7 ± 4.2                                          | 65.8 ± 5.6                                          |
| MTT extinction <sup>550nm</sup><br>in arbitrary units<br>after 72 hrs | 1304.5 ±<br>43.1                                 | 1433 ± 47.9                                      | 1366.5 ± 38.2                                       | 1308 ± 46.9                                         |

Supplementary Table 2B. Baseline LDH-release (see Figure 1E)

|                                          | <i>Ung</i> <sup>+/+</sup><br>cortical<br>neurons | <i>Ung</i> <sup>-/-</sup><br>cortical<br>neurons | <i>Ung</i> <sup>+/+</sup><br>hippocampal<br>neurons | <i>Ung</i> <sup>-/-</sup><br>hippocampal<br>neurons |
|------------------------------------------|--------------------------------------------------|--------------------------------------------------|-----------------------------------------------------|-----------------------------------------------------|
| LDH [units/ml<br>medium] after 24<br>hrs | 56.0 ± 2.1                                       | 50.3 ± 4.1                                       | 84.1 ± 5.1                                          | 84.9 ± 5.2                                          |
| LDH [units/ml<br>medium] after 48<br>hrs | 48.9 ± 1.5                                       | 47.4 ± 3.2                                       | 85.6 ± 7.6                                          | 88.1 ± 4.8                                          |
| LDH [units/ml<br>medium] after 72<br>hrs | 64.1 ± 8.0                                       | 55.3 ± 2.6                                       | 91.4 ± 9.9                                          | 88.7 ± 7.4                                          |
